# Supplementary material for: Mitochondria-targeted artesunate conjugated cyclometalated iridium(iii) complexes as potent anti-HepG2 hepatocellular carcinoma agents
Source: Royal Society of Chemistry journal article supplement (doi:10.1039/d0mt00060d), 2020-05-12
Supplement: d0mt00060d1.pdf [file d0mt00060d1.pdf]

## Supporting Information

### **Mitochondria-targeted artesunate conjugated cyclometalated iridium(III) complexes as potent anti-HepG2 hepatocellular carcinoma agents**

**Rui-Rong Ye,<sup>‡\*</sup> Wan Peng,<sup>‡\*</sup> Bi-Chun Chen,<sup>a</sup> Ning Jiang,<sup>a</sup> Xuan-Qin Chen,<sup>a</sup>  
Zong-Wan Mao<sup>\*b</sup> and Rong-Tao Li<sup>\*a</sup>**

*<sup>a</sup> Faculty of Life Science and Technology, Kunming University of Science and Technology, Kunming  
650500, P. R. China*

*<sup>b</sup> MOE Key Laboratory of Bioinorganic and Synthetic Chemistry, School of Chemistry, Sun Yat-Sen  
University, Guangzhou 510275, P. R. China.*

\* Corresponding author.

E-mail addresses: yerr@mail2.sysu.edu.cn (R.-R. Ye), cesmzw@mail.sysu.edu.cn (Z.-W. Mao),  
rongtaolikm@163.com (R.-T. Li).

<sup>‡</sup> These authors contributed equally.

## Table of Contents

|                                                                                                                                                                                                                                                                                                                                                                                                   |      |
|---------------------------------------------------------------------------------------------------------------------------------------------------------------------------------------------------------------------------------------------------------------------------------------------------------------------------------------------------------------------------------------------------|------|
| <b>Scheme S1</b> Synthetic routes of <b>Ir-ART-1-3</b> .....                                                                                                                                                                                                                                                                                                                                      | S-3  |
| <b>Fig. S1-S9</b> ESI-MS, <sup>1</sup> H NMR spectrum and <sup>13</sup> C NMR spectrum of <b>Ir-ART-1-3</b> .....                                                                                                                                                                                                                                                                                 | S-4  |
| <b>Fig. S10</b> UV/Vis absorption and emission spectra of <b>Ir-ART-1-3</b> .....                                                                                                                                                                                                                                                                                                                 | S-8  |
| <b>Fig. S11</b> Emission spectra of $1 \times 10^{-5}$ M iridium complexes conjugate with ( <b>Ir-ART-1-3</b> ) or without ( <b>Ir-1-3</b> ) ART in PBS.....                                                                                                                                                                                                                                      | S-9  |
| <b>Fig. S12</b> Emission spectra of <b>Ir-ART-1</b> (A), <b>Ir-ART-2</b> (B) and <b>Ir-ART-3</b> (C) in PBS (a), CH <sub>3</sub> CN (b) and CH <sub>2</sub> Cl <sub>2</sub> (c) at 0 and 48 h.....                                                                                                                                                                                                | S-9  |
| <b>Fig. S13</b> (A) Time-dependent changes in emission spectra ( $1 \times 10^{-5}$ M, $\lambda_{\text{ex}} = 405$ nm) of <b>Ir-ART-1</b> (a), <b>Ir-ART-2</b> (b) and <b>Ir-ART-3</b> (c) with PLE at 298 K. (B) Plots of relative emission intensities at 570 nm ( <b>Ir-ART-1</b> , a), 600 nm ( <b>Ir-ART-2</b> , b) and 520 nm ( <b>Ir-ART-3</b> , c) versus time of esterase treatment..... | S-10 |
| <b>Fig. S14</b> Detection of apoptosis in HepG2 cells stained with Annexin V-FITC/PI by confocal microscopy.....                                                                                                                                                                                                                                                                                  | S-11 |
| <b>Table S1</b> Photophysical data of Ir(III) complexes.....                                                                                                                                                                                                                                                                                                                                      | S-12 |
| <b>Table S2</b> Cell-cycle analysis data of Ir(III)-ART conjugates on HepG2 cells.....                                                                                                                                                                                                                                                                                                            | S-13 |

### Scheme S1 Synthetic routes of Ir-ART-1, Ir-ART-2 and Ir-ART-3

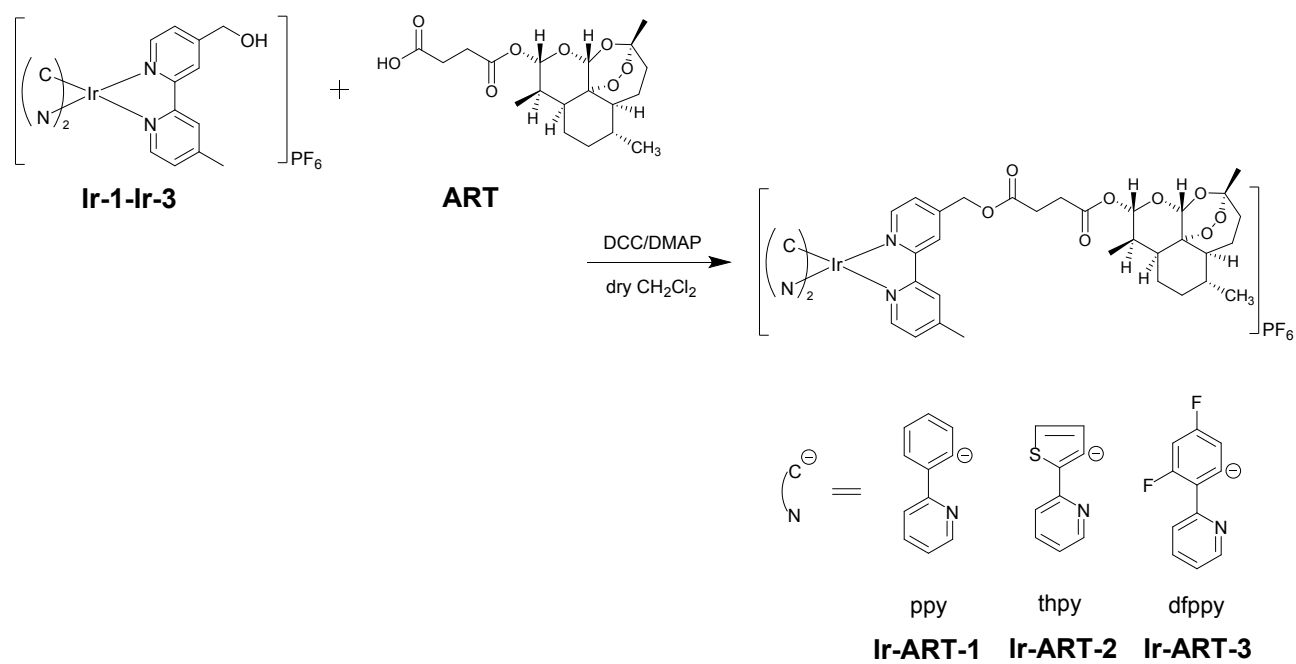

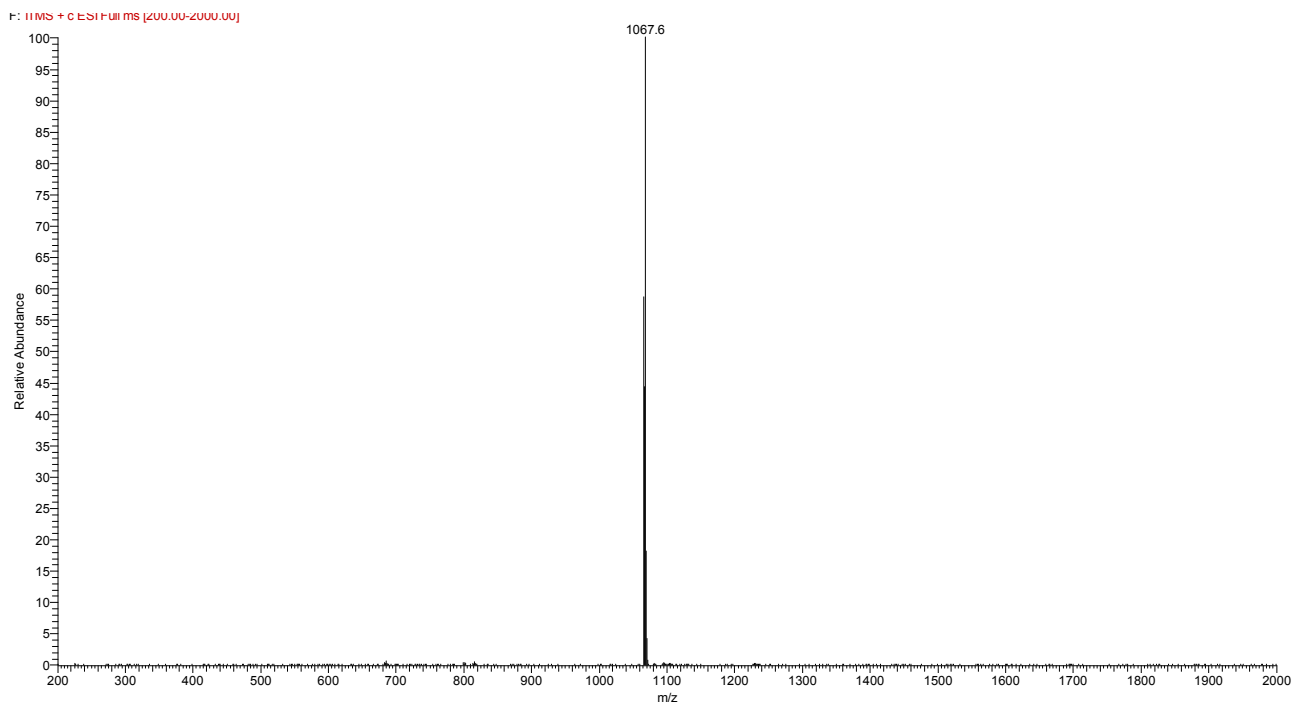

**Fig. S1** ESI-MS characterization of **Ir-ART-1**, 1067.6 [M-PF<sub>6</sub>]<sup>+</sup>.

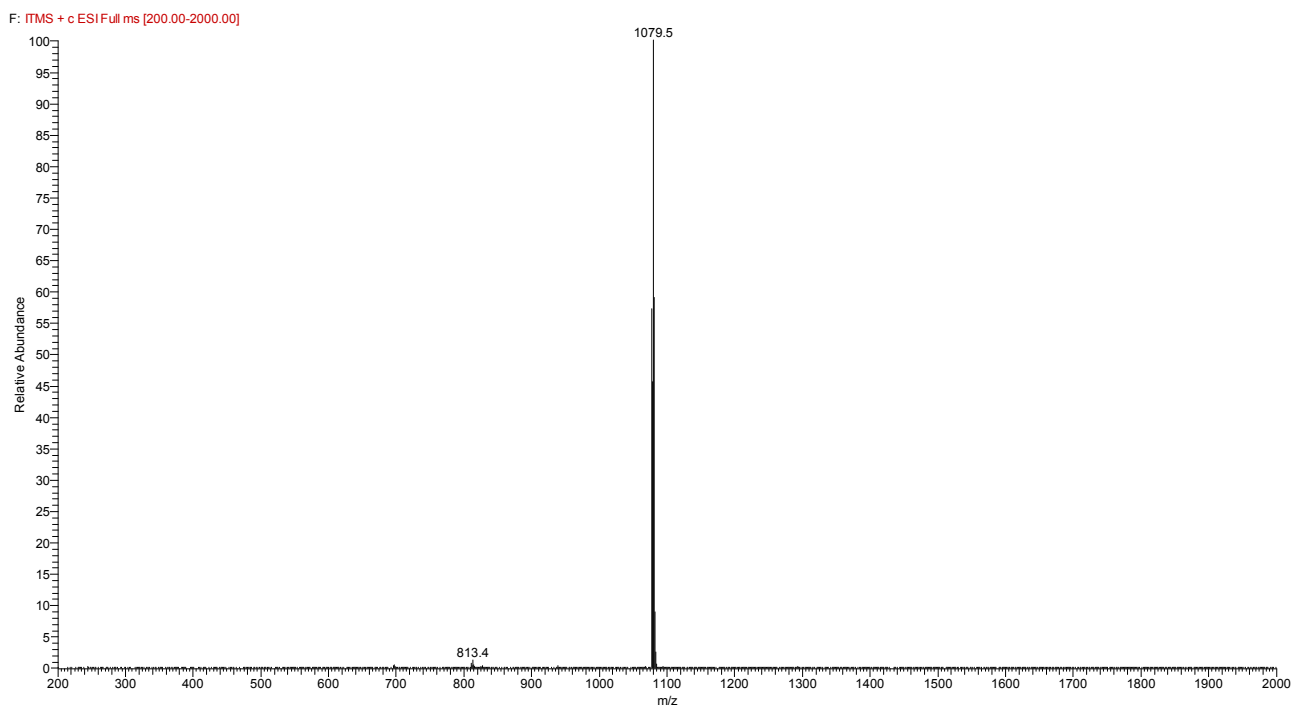

**Fig. S2** ESI-MS characterization of **Ir-ART-2**, 1079.5 [M-PF<sub>6</sub>]<sup>+</sup>.

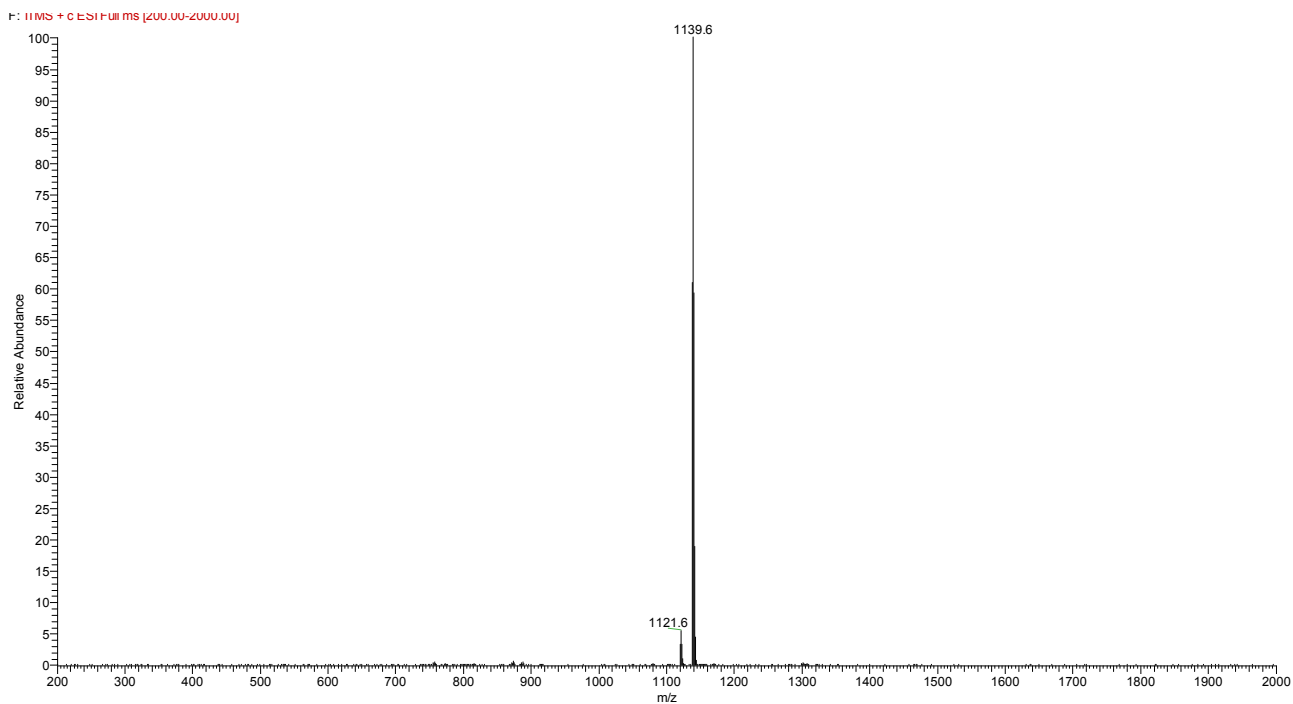

**Fig. S3** ESI-MS characterization of Ir-ART-3, 1139.6 [M-PF<sub>6</sub>]<sup>+</sup>.

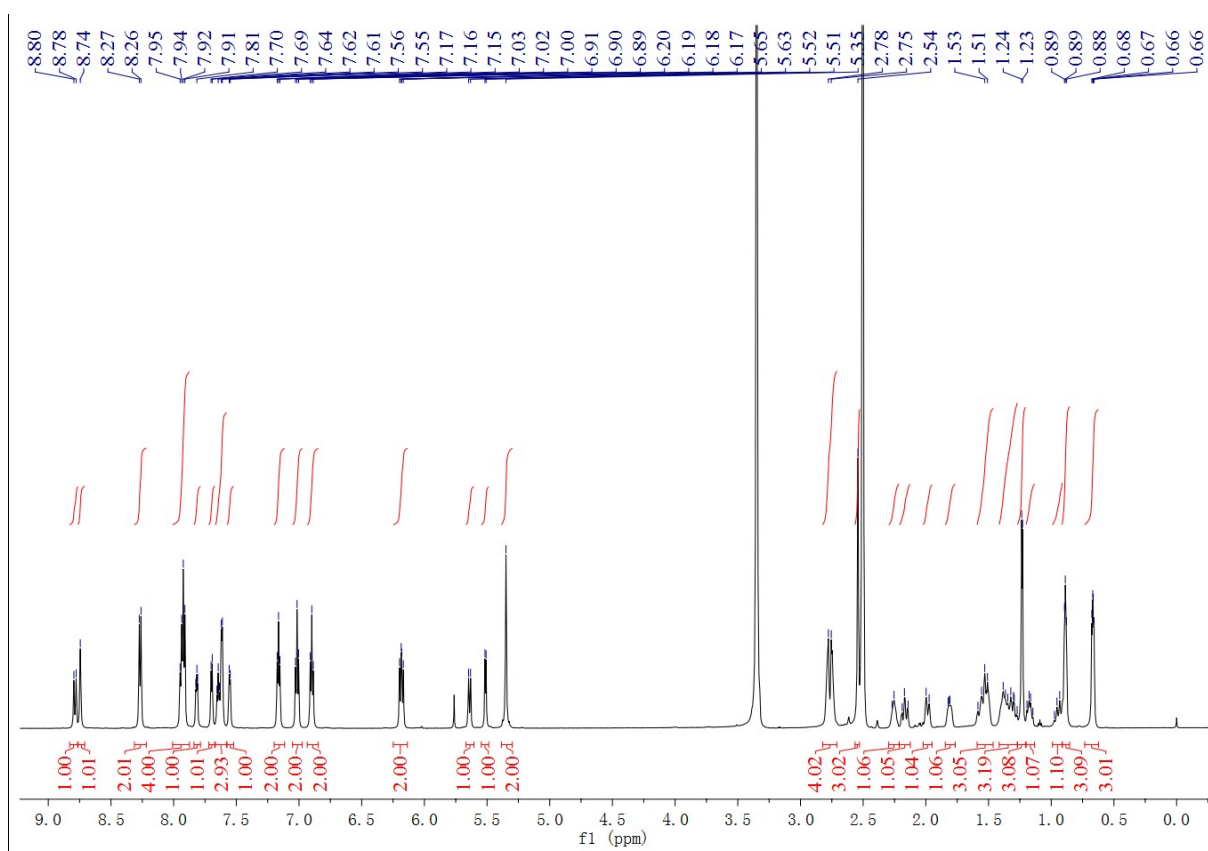

**Fig. S4** <sup>1</sup>H NMR spectrum of Ir-ART-1.

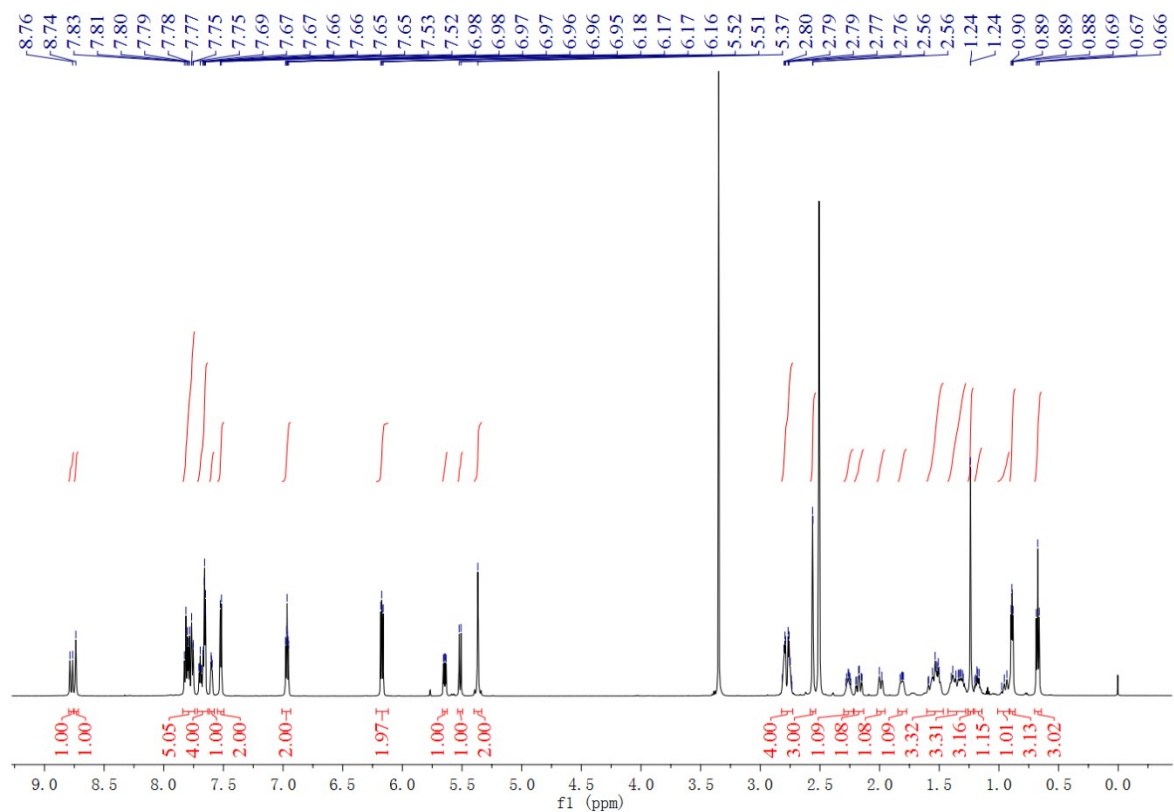

**Fig. S5**  $^1\text{H}$  NMR spectrum of Ir-ART-2.

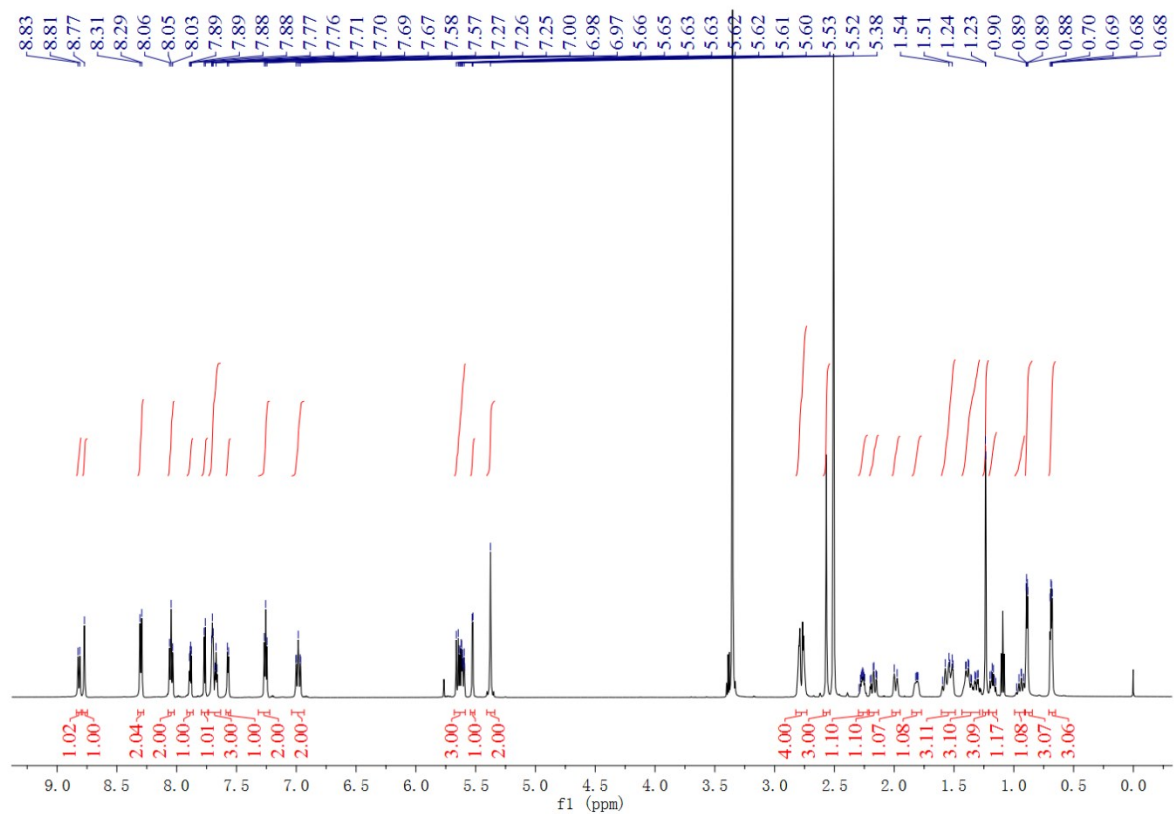

**Fig. S6**  $^1\text{H}$  NMR spectrum of Ir-ART-3.

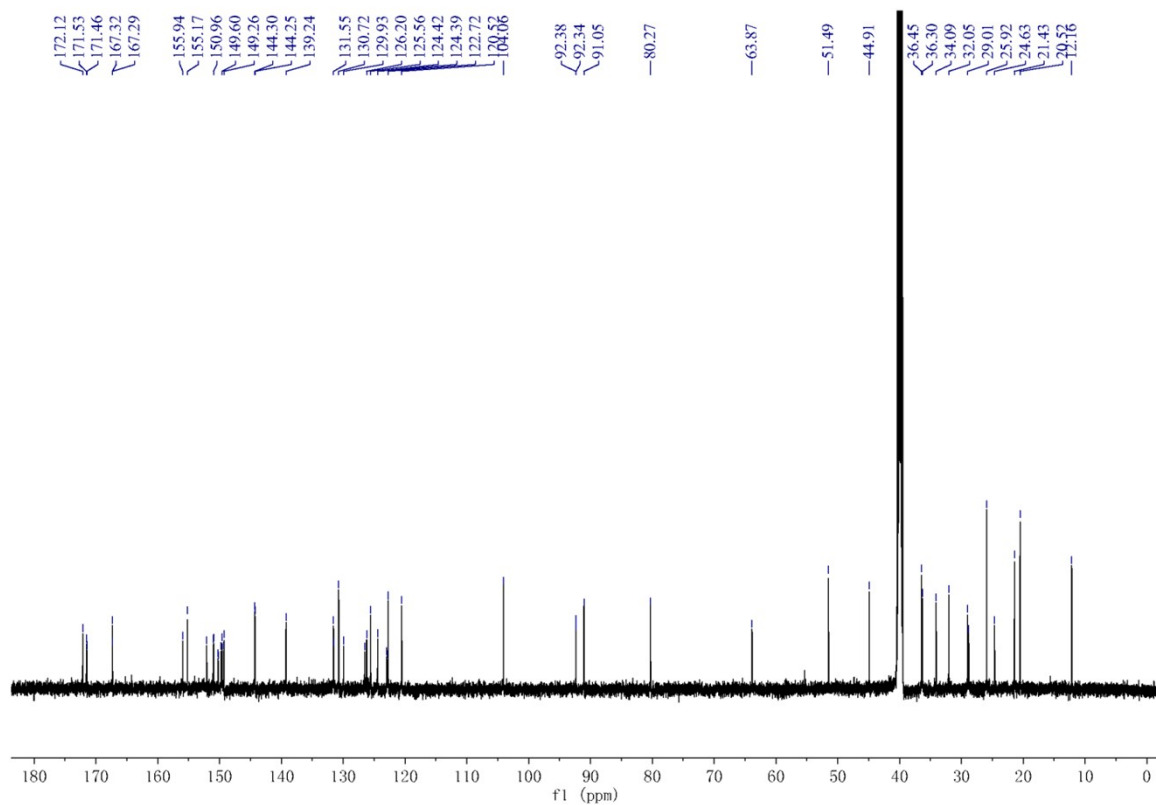

**Fig. S7**  $^{13}\text{C}$  NMR spectrum of Ir-ART-1.

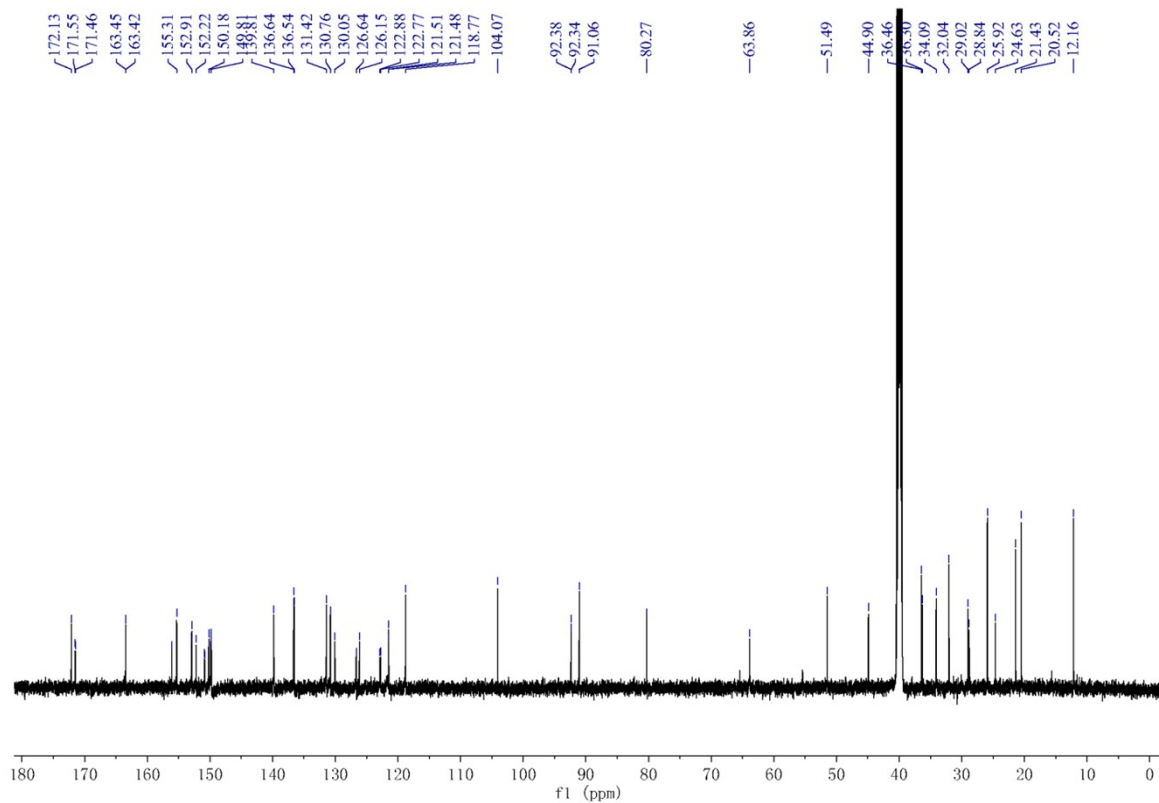

**Fig. S8**  $^{13}\text{C}$  NMR spectrum of Ir-ART-2.

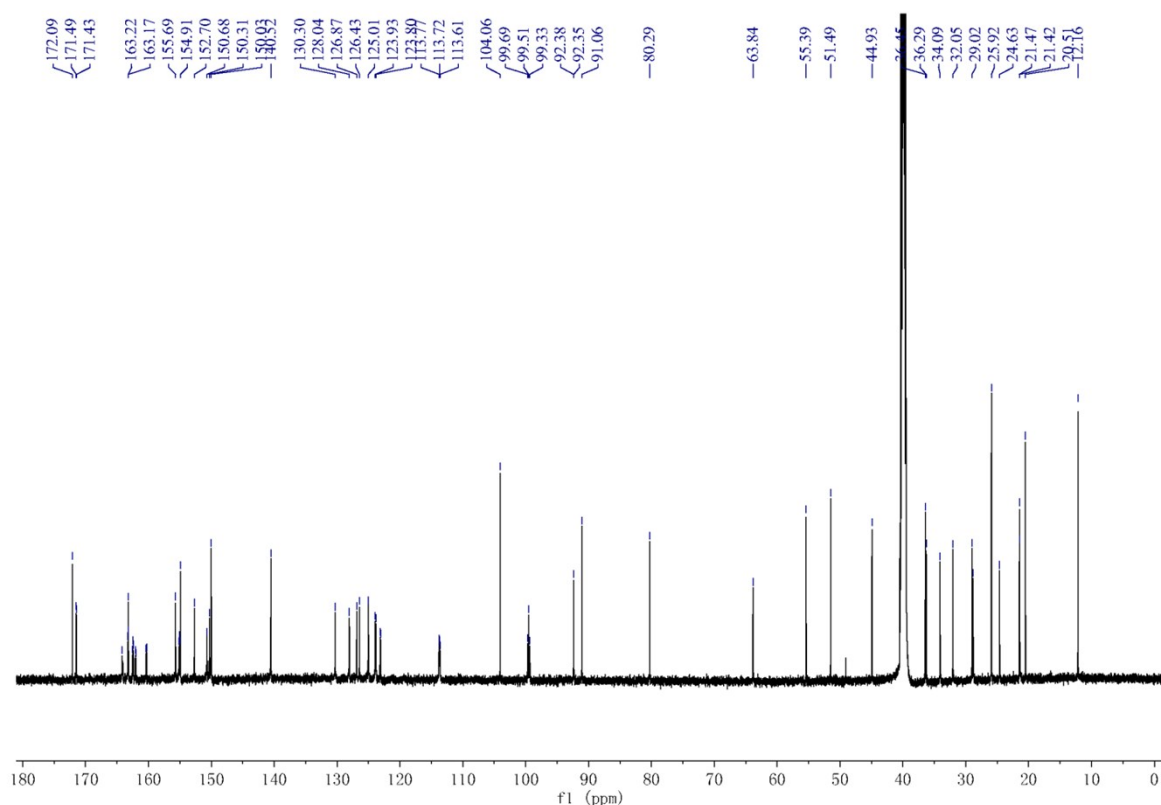

Fig. S9  $^{13}\text{C}$  NMR spectrum of Ir-ART-3.

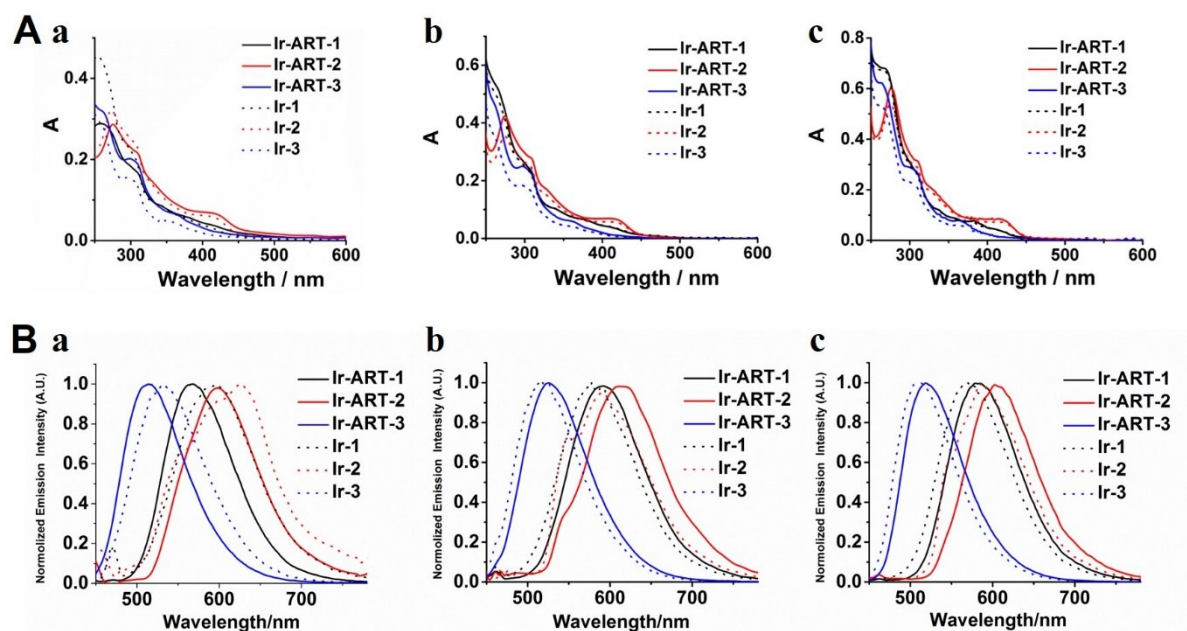

Fig. S10 (A) UV/Vis spectra ( $1 \times 10^{-5}$  M) of Ir(III) complexes measured in PBS (a),  $\text{CH}_3\text{CN}$  (b) and  $\text{CH}_2\text{Cl}_2$  (c) at 298 K. (B) Emission spectra ( $1 \times 10^{-5}$  M) of Ir(III) complexes measured in PBS (a),  $\text{CH}_3\text{CN}$  (b) and  $\text{CH}_2\text{Cl}_2$  (c) at 298 K ( $\lambda_{\text{ex}} = 405$  nm).



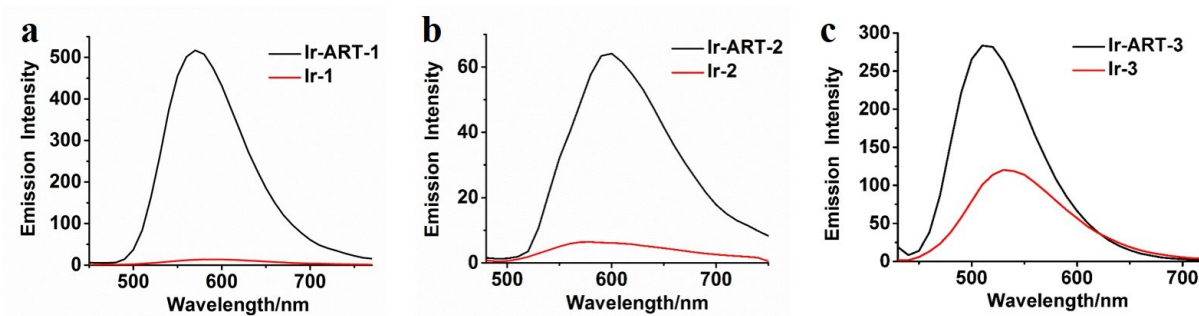

**Fig. S11** Emission spectra of  $1 \times 10^{-5}$  M iridium complexes conjugate with (**Ir-ART-1-3**) or without (**Ir-1-3**) ART in PBS.

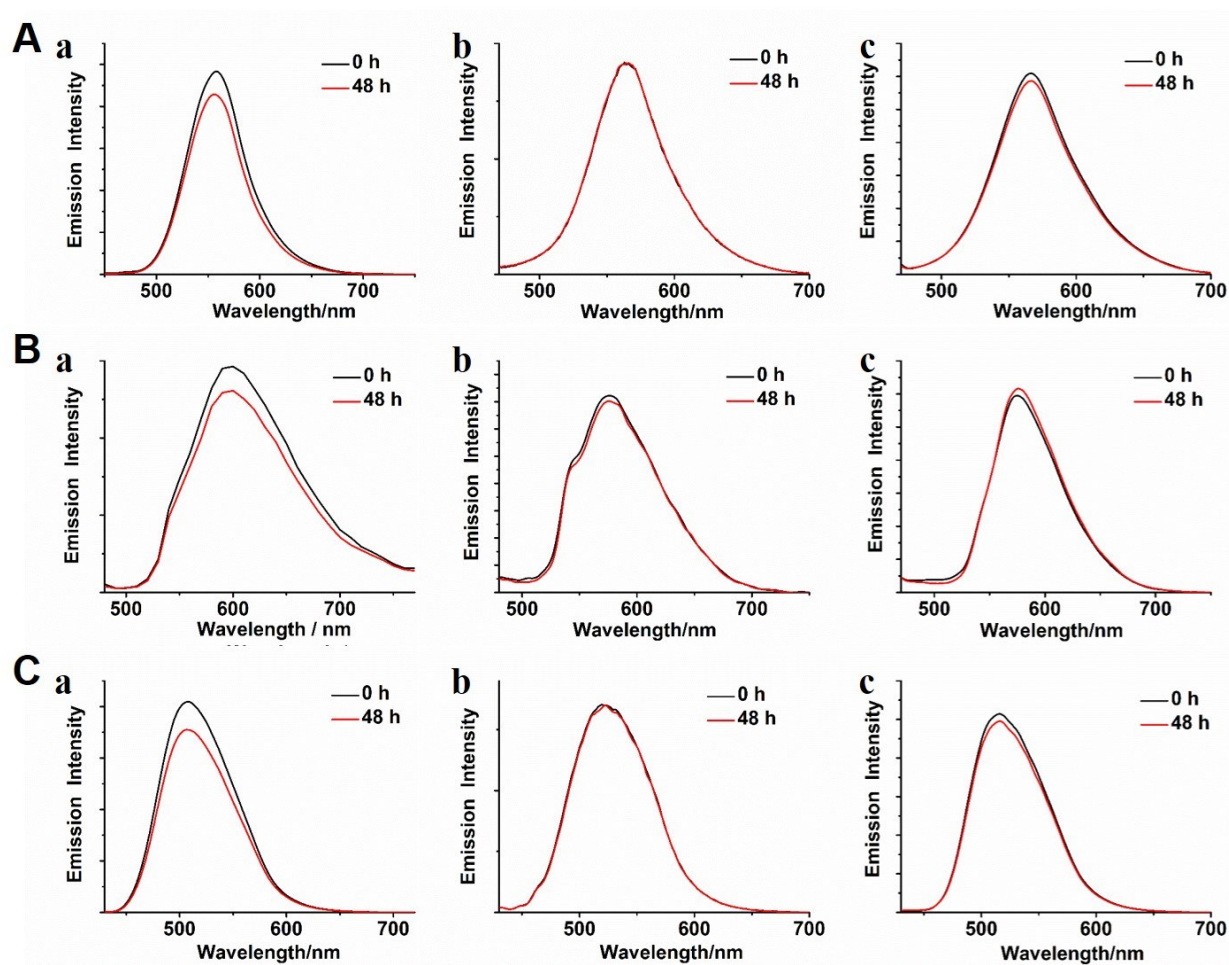

**Fig. S12** Emission spectra of **Ir-ART-1** (A), **Ir-ART-2** (B) and **Ir-ART-3** (C) in PBS (a),  $\text{CH}_3\text{CN}$  (b) and  $\text{CH}_2\text{Cl}_2$  (c) at 0 and 48 h.

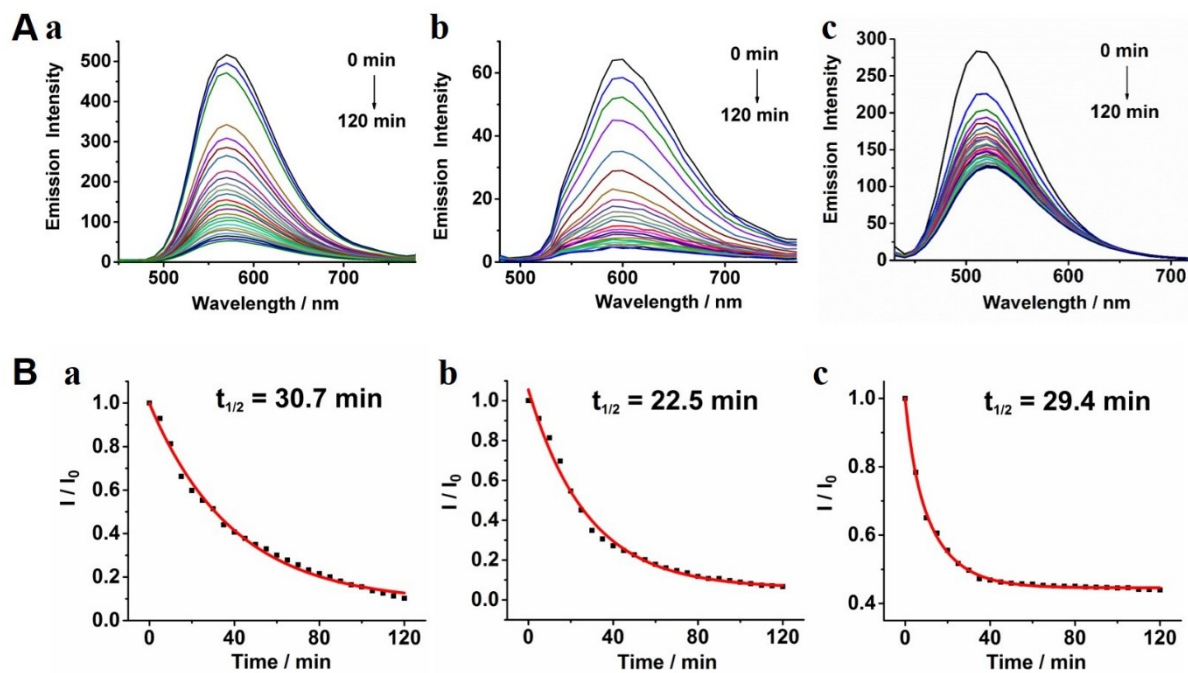

**Fig. S13** (A) Time-dependent changes in emission spectra ( $1 \times 10^{-5}$  M,  $\lambda_{\text{ex}} = 405$  nm) of **Ir-ART-1** (a), **Ir-ART-2** (b) and **Ir-ART-3** (c) with PLE at 298 K. (B) Plots of relative emission intensities at 570 nm (**Ir-ART-1**, a), 600 nm (**Ir-ART-2**, b) and 520 nm (**Ir-ART-3**, c) versus time of esterase treatment.

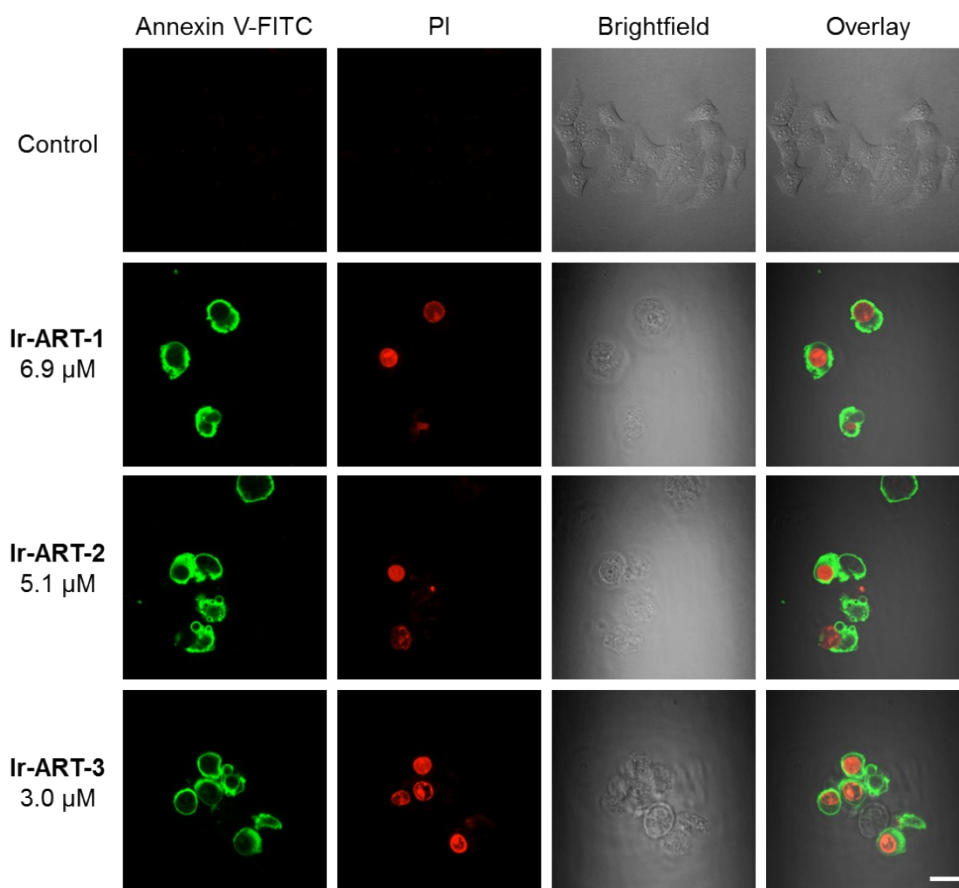

**Fig. S14** Detection of apoptosis in HepG2 cells stained with Annexin V-FITC/PI by confocal microscopy after HepG2 cells were incubated with **Ir-ART-1–3** for 24 h.

**Table S1** Photophysical data of Ir(III) complexes

| Compounds       | Medium                          | $\lambda_{\text{abs, max}}$ (nm) | $\lambda_{\text{em, max}}$ (nm) |
|-----------------|---------------------------------|----------------------------------|---------------------------------|
| <b>Ir-ART-1</b> | PBS                             | 380                              | 570                             |
|                 | CH <sub>3</sub> CN              | 341                              | 592                             |
|                 | CH <sub>2</sub> Cl <sub>2</sub> | 338                              | 582                             |
| <b>Ir-ART-2</b> | PBS                             | 417                              | 600                             |
|                 | CH <sub>3</sub> CN              | 417                              | 615                             |
|                 | CH <sub>2</sub> Cl <sub>2</sub> | 420                              | 605                             |
| <b>Ir-ART-3</b> | PBS                             | 364                              | 520                             |
|                 | CH <sub>3</sub> CN              | 362                              | 525                             |
|                 | CH <sub>2</sub> Cl <sub>2</sub> | 365                              | 520                             |
| <b>Ir-1</b>     | PBS                             | 380                              | 595                             |
|                 | CH <sub>3</sub> CN              | 341                              | 578                             |
|                 | CH <sub>2</sub> Cl <sub>2</sub> | 338                              | 570                             |
| <b>Ir-2</b>     | PBS                             | 417                              | 625                             |
|                 | CH <sub>3</sub> CN              | 417                              | 590                             |
|                 | CH <sub>2</sub> Cl <sub>2</sub> | 420                              | 590                             |
| <b>Ir-3</b>     | PBS                             | 364                              | 533                             |
|                 | CH <sub>3</sub> CN              | 362                              | 516                             |
|                 | CH <sub>2</sub> Cl <sub>2</sub> | 365                              | 510                             |

**Table S2** Cell-cycle analysis data of Ir(III)-ART conjugates on HepG2 cells<sup>a</sup>

| Compounds                | G0/G1        | S            | G2/M         |
|--------------------------|--------------|--------------|--------------|
| Control                  | 47.17 ± 4.52 | 38.28 ± 3.81 | 14.54 ± 1.40 |
| <b>Ir-ART-1</b> (4.6 μM) | 50.39 ± 4.79 | 26.66 ± 3.00 | 22.96 ± 2.35 |
| <b>Ir-ART-1</b> (6.9 μM) | 38.15 ± 3.76 | 22.56 ± 2.30 | 39.29 ± 3.91 |
| <b>Ir-ART-1</b> (9.2 μM) | 38.90 ± 3.77 | 25.13 ± 2.55 | 35.98 ± 3.60 |
| <b>Ir-ART-2</b> (3.4 μM) | 51.75 ± 5.00 | 24.60 ± 2.78 | 23.65 ± 2.32 |
| <b>Ir-ART-2</b> (5.1 μM) | 45.85 ± 4.76 | 26.25 ± 2.88 | 27.90 ± 2.93 |
| <b>Ir-ART-2</b> (6.8 μM) | 40.72 ± 4.00 | 25.47 ± 2.55 | 33.81 ± 3.62 |
| <b>Ir-ART-3</b> (2.0 μM) | 55.91 ± 5.66 | 26.38 ± 2.68 | 17.71 ± 1.72 |
| <b>Ir-ART-3</b> (3.0 μM) | 51.92 ± 5.22 | 25.11 ± 2.54 | 22.97 ± 2.00 |
| <b>Ir-ART-3</b> (4.0 μM) | 46.36 ± 4.60 | 25.51 ± 2.46 | 28.14 ± 2.88 |

<sup>a</sup> Data shown are mean ± SD of three independent experiments for each treatment.
